# Supplementary material for: Measurement report: Dust impact on hygroscopicity and volatility of submicron aerosols: Based on the observation in April of Beijing
Source: Copernicus journal article supplement (doi:10.5194/egusphere-2025-3796), 2025-08-27
Supplement: Supplementary file 1 [file egusphere-2025-3796-supplement.pdf]

## Supplement of

### Measurement report: Dust impact on hygroscopicity and volatility of submicron aerosols: Based on the observation in April of Beijing

Xinyao Hu<sup>1,2</sup>, Aoyuan Yu<sup>1,3</sup>, Xiaojing Shen<sup>1,2</sup>, Jiayuan Lu<sup>1,4</sup>, Yangmei Zhang<sup>1,2</sup>, Quan  
5 Liu<sup>1,2</sup>, Lei Liu<sup>1,2</sup>, Linlin Liang<sup>1,2</sup>, Hongfei Tong<sup>1,2</sup>, Qianli Ma<sup>5</sup>, Shuxian Zhang<sup>5</sup>, Bing  
Qi<sup>6</sup>, Rongguang Du<sup>6</sup>, Huizheng Che<sup>1,2</sup>, Xiaoye Zhang<sup>1,2</sup>, and Junying Sun<sup>1,2\*</sup>

<sup>1</sup>State Key Laboratory of Severe Weather Meteorological Science and Technology, Chinese Academy  
of Meteorological Sciences, Beijing, 100081, China

<sup>2</sup>Key Laboratory of Atmospheric Chemistry of CMA, Chinese Academy of Meteorological Sciences,  
10 Beijing, 100081, China

<sup>3</sup>Dalian Meteorological Observatory, Dalian, 116000, China

<sup>4</sup>Department of Atmospheric and Oceanic Sciences and Institute of Atmospheric Sciences, Fudan  
University, Shanghai, 200433, China

<sup>5</sup>Lin'an Atmosphere Background National Observation and Research Station, Lin'an 311307, Hangzhou,  
15 China

<sup>6</sup>Hangzhou Meteorological Bureau, Hangzhou, 310051, China

\*Correspondence to: Junying Sun (jysun@cma.gov.cn)

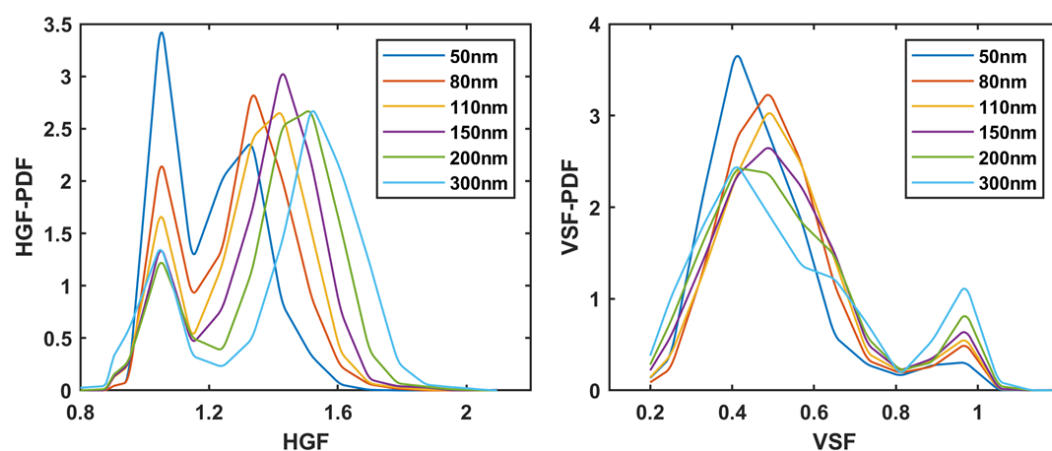

Figure S1. Mean hygroscopic growth factor probability density function (HGF-PDF)  
20 and volatile shrink factor probability density function (VSF-PDF) for particles ranging

from 50 to 300 nm during the sampling period.

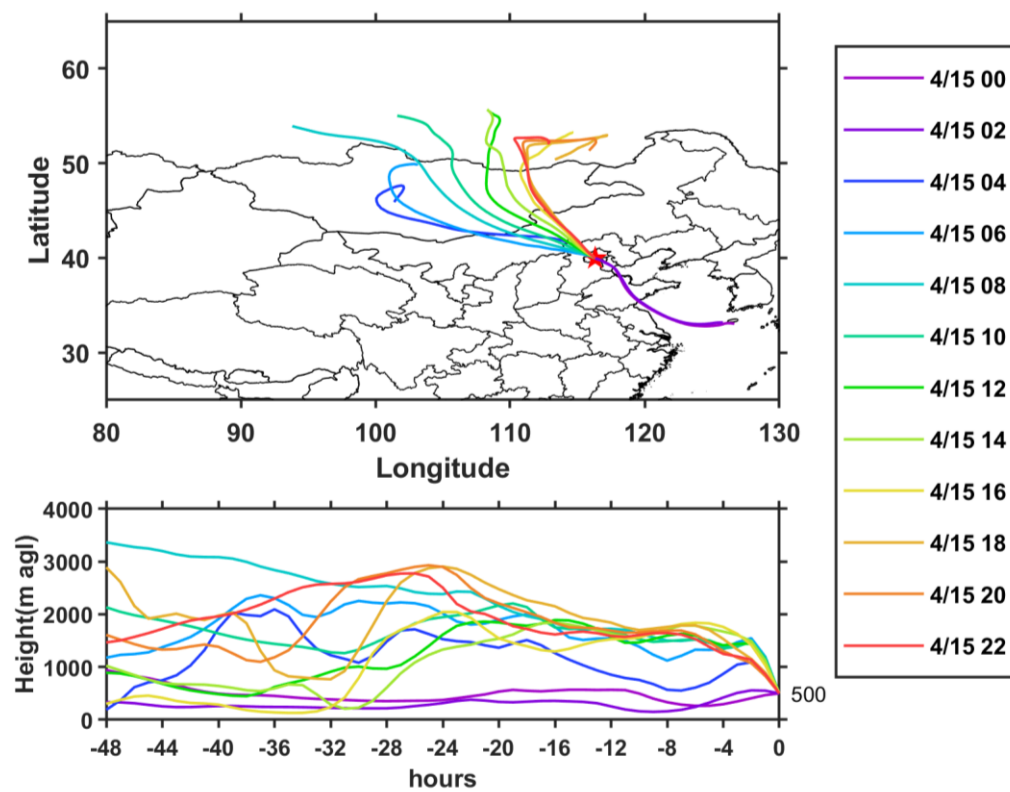

Figure S2. The 48-h back trajectories on April 15 calculated using the HYSPLIT model arriving at the CAMS site with a terminal height of 500 m a.g.l.
